# Supplementary material for: From Anti-Severe Acute Respiratory Syndrome Coronavirus 2 Immune Response to Cancer Onset via Molecular Mimicry and Cross-Reactivity
Source: PubMed Central journal article supplement (PMC8635832; doi:10.1055/s-0041-1735590), 2021-09-07
Supplement: 10-1055-s-0041-1735590-s2100033.pdf [file 10-1055-s-0041-1735590-s2100033.pdf]

**Supplementary Table S1** List of 782 human proteins (in)directly linked to cancer and obtained from UniProtKB database ([www.uniprot.org](http://www.uniprot.org)) using “tumor suppressor” as keywords

2A5G; 2AAA; 2AAB; ACER2; ACK1; ACL6A; ACTB; AGAP2; AGRA2; AGRA3; AGRB1; AHRR; AHS1; AIM2; AKT1; AMER1; AMER2; AMRP; AN32A; ANM3; ANM5; ANM6; AP2A; AP2C; APAF; APC; APCL; ARF; ARHG4; ARI3B; ARL11; ASC; ASPP2; ATF2; ATG7; ATM; ATR; AXIN1; B2L14; B4GA1; BANP; BAP1; BARD1; BAX; BC11B; BCCIP; BCL10; BCL7B; BECN1; BHE40; BICRA; BICRL; BIN1; BIRC2; BIRC3; BLCAP; BMI1; BMR1A; BNI3L; BORC5; BRCA1; BRCA2; BRD1; BRD4; BRD7; BRD8; BRD9; BRE1A; BRMS1; BRNP1; BRPF1; BRPF3; BTG2; BTK; BUB1B; C56D2; CA052; CA2D3; CADM1; CADM3; CADM4; CARF; CAVN3; CBL; CBPC2; CBX2; CBX4; CBX7; CBX8; CCAR2; CCL24; CCND1; CCND3; CCNE1; CDC23; CDC37; CDC73; CDHR2; CDK10; CDK4; CDK6; CDKA1; CDN1B; CDN1C; CDN2A; CDN2B; CDN2C; CDN2D; CERS2; CHD5; CHDH; CHFR; CHK1; CHK2; CI014; CIA2A; CIAO1; CIP2A; CJ090; CK5P3; CKAP4; CLCA1; CLCA2; CMTA1; CMTA2; CNDP2; CO4A1; COMD1; CRBL2; CRCM; CREB3; CRTAM; CSC2A; CSK21; CSK23; CSMD1; CSN5; CSRN1; CTCF; CTCFL; CTDSL; CTIP; CTNB1; CUL2; CYLD; DAB2; DAB2P; DAPK1; DAPK3; DAXX; DBF4A; DCC; DDB1; DDIT4; DDT4L; DDX17; DDX3X; DDX5; DDX58; DEC1; DEMA; DEP5; DERPC; DFFB; DI3L2; DIDO1; DIRA1; DIRA3; DLEC1; DLG1; DLG3; DLG4; DLP1; DMAP1; DMBT1; DMRT1; DMTF1; DNJA3; DNJB6; DNMT1; DOCK8; DPH1; DRC6; DUS16; DVL3; E2F1; E2F2; E41L3; E4F1; EAF2; EAF6; EFNA1; EGFR; EGLN1; EHF; EHMT1; EHMT2; EI24; EIF3E; ELOB; ELOC; EM55; ENOA; EP300; EPB41; EPC1; EPHB2; ERFFI; ESR1; ESR2; EXT1; EXT2; EXTL2; EXTL3; EZH2; F107A; F10A1; F10A5; F10A5; F120A; F210B; FA83D; FAPB7; FANCG; FANCM; FAT1; FAT3; FAT4; FBLN1; FBW1A; FBX31; FBXL2; FBXW5; FBXW7; FES; FETUB; FGL1; FHIT; FL2D; FLCN; FOCAD; FOXC1; FOXD1; FOXO1; FOXO1; FRK; FRMD3; FUMH; FZD5; GBRAP; GBRL2; GCR; GGNB2; GKAP1; GKN2; GNTK; GP15L; GPS2; GRAA; GRB2; GRK5; GSDME; HABP2; HACE1; HAVR2; HDAC1; HDAC7; HEMK1; HERC5; HGS; HIC1; HIC2; HIF1A; HIF3A; HINT1; HIPK2; HM20B; HOP; HRG; HS90A; HTAI2; HTRA3; HUWE1; HYAL1; HYAL2; HYAL3; I23O1; IBPL1; IF16; IF4A1; IF4E; IFIX; IFRD2; IGF1R; IKKE; IL24; IL37; ING1; ING2; ING3; ING4; ING5; INP4B; INSM2; INT6; IRF1; IRF3; ITIH5; JADE1; JADE2; JADE3; JHD2C; KANK1; KAT5; KAT6A; KAT6B; KAT7; KCD11; KCD21; KCNRC; KCTD6; KDM3B; KDM5B; KI13B; KIBRA; KIF1B; KIF3A; KIF3B; KISS1; KISSR; KIT; KLF4; KLF6; KLK10; KMT5A; KPCD; KPCG; KPCI; KPYM; KS6A1; KS6A2; KS6A3; L2GL1; L2GL2; LACTB; LARG1; LARG2; LATS1; LATS2; LEO1; LEU1; LEU7; LGI1; LGR6; LIMD1; LIN9; LMBL1; LN28A; LN28B; LPP; LPPRC; LRP12; LRP1B; LYPD1; LZTL1; LZTS1; LZTS2; LZTS3; M2OM; M3K20; M3K7; MAD1; MAF; MAFB; MAGI2; MAGI3; MANS1; MAOM; MAP1S; MAPK3; MAPK5; MAST2; MAVS; MCA3; MCM2; MCT5; MDM2; MED28; MEN1; MENT; MEOX2; MERL; MERTK; MFHA1; MINY3; MIO; MIRO1; MITF; MK01; MK03; MK12; MK14; MK15; MLH1; MLP3A; MMP14; MMP2; MMP9; MN1; MO4L1; MO4L2; MOAP1; MOD5; MP2K4; MPP2; MPP3; MRGBP; MSH2; MSTRO; MTA1; MTAP; MTG16; MTG8R; MTOR; MTS51; MTUS1; MTUS2; MUC1; MUTYH; MXI1; MY18B; MZF1; NAA80; NACC1; NAPEP; NBL1; NDKA; NDKB; NDRG1; NDRG2; NEB2; NEDD8; NEMF; NEMO; NEUL1; NF1; NFKB1; NFKB2; NISCH; NIT1; NIT2; NKX31; NMDE2; NOL7; NOP53; NPAS2; NPM; NPRL2; NPRL3; NSA2; NSE3; NSG1; NSMA2; OGR1; OPCM; OVCA2; P53; P5113; P63; P73; PA2G4; PACER; PAF1; PAF15; PAI1; PALB2; PANO1; PARK7; PAWR; PB1; PCGF2; PCGF6; PCM1; PDCD4; PEG3; PERP; PEX19; PFD3; PFD5; PGBD5; PGDH; PGFRL; PHC1; PHC2; PHC3; PHF24; PHLA3; PHLP1; PHLP2; PIAS1; PIAS2; PIN1; PININ; PINX1; PKHG2; PKHO1; PLAL1; PLAT1; PLAT2; PLAT3; PLAT4; PLK1; PLK2; PLPP5; PML; PMS1; PMS2; PNM8A; PPAP; PPP5; PRDM2; PRDM4; PRDM5; PRDX1; PRKN; PRR5; PTC1; PTC2; PTEN; PTN14; PTPRJ; PTPRK; PUF60; R51A1; RAD54; RAF1; RAI3; RAP1A; RASA1; RASEF; RASF1; RASF2; RASF3; RASF4; RASF5; RASFA; RASH; RASK; RB; RBBP4; RBBP7; RBCC1; RBL1; RBL2; RBM5; RBM6; RBM8A; RBMX; RBP2; RBX1; RECK; RFIP4; RGPA1; RGS16; RHG07; RHG20; RHG29; RHG35; RHOB; RHXF2; RING1; RING2; RL10; RMP; RN126; RN135; RN167; RNF43; RNZ1; RPH3L; RRAGA; RRAGB; RRAGC; RRAGD; RS29; RSLAA; RSPO1; RSPO2; RSPO3; RUNX3; RUVB1; RUVB2; S10A2; S10A6; S22AI; S26A3; S38A3; SAPC2; SASH1; SATB1; SAV1; SC5A8; SCAI; SCRIB; SDHA; SDS3; SEC13; SEH1; SEM3B; SEPR; SESN1; SET; SETB1; SETD2; SGSM3; SHAN2; SHC1; SHIA1; SIK1; SIR1; SIR2; SIR4; SMAD2; SMAD4; SMAD5; SMAD6; SMCA4; SMO; SMRC1; SMRD1; SMRD3; SMYD2; SN12L; SNF5; SNW1; SP1; SP100; SPB5; SQSTM; SSXT; ST134; ST14; ST18; ST20; ST65G; ST7; ST7L; STA13; STA5B; STAT3; STEA3; STIM1; STIP1; STK11; STK3; STK4; STRAA; SUFU; SUMO1; SUMO2; SUSD2; SUSD6; SYN2; T106A; T132E; T184C; T5311; TAB2; TAB3; TACC2; TAF1; TAF1C; TARG1; TASOR; TBK1; TBRG1; TCAL7; TCF7; TCHP; TCP1L; TEBP; TEFF1; TES; TET2; TF2H1; TF65; TF7L2; TFE3; TFF1; TGO1; THEM4; TIF1A; TIF1B; TIG1; TIRAP; TM115; TM127; TM158; TMM8B; TMUB1; TNK1; TOPB1; TOPK; TOPRS; TP53B; TPA; TRADD; TRAF2; TRAF6; TRAFIP; TRI13; TRI35; TRI36; TRI37; TRI59; TRIP6; TRIPC; TRM9B; TSC1; TSC2; TTP; TUSC1; TUSC2; TUSC3; TUT7; TXNIP; TZAP; U2QL1; UB2V1; UBAP1; UBC9; UBE2O; UBE3A; UBP11; UBP12; UBP20; UBP28; UBP33; UBP7; UBR5; UBXN1; UHRF1; UHRF2; UN93A; UROK; USBP1; USH1C; UVRAG; VHL; VILL; VISTA; VMA5A; VRK1; WDR24; WDR48; WDR59; WNT4; WNT5A; WT1; WWOX; XAF1; XPO1; XRN1; YAP1; YETS4; ZBT7A; ZBT7C; ZC12D; ZDH14; ZDH17; ZDHC2; ZFH3; ZGPAT; ZMY10; ZMY11; ZN217; ZN276; ZN304; ZN652; ZNRF3; ZOI1; ZSC32; ZZEF1

Note: Proteins listed by UniProt entry.

**Supplementary Table S2** Pentapeptide sharing between SARS-CoV-2 spike gp and human proteins (in)directly related to cancer

|                            |                                                                                            |
|----------------------------|--------------------------------------------------------------------------------------------|
| VLLPL                      | 2A5G. Serine/threonine-protein phosphatase 2A 56 kDa regulatory subunit gamma isoform      |
| SQILP                      | 2AAA. Serine/threonine-protein phosphatase 2A 65 kDa regulatory subunit A $\alpha$ isoform |
| KLIAN                      | ACL6A. Actin-like protein 6A                                                               |
| AGAAA, ASALG               | AGRA2. Adhesion G protein-coupled receptor A2                                              |
| QAGST                      | AGRA3. Adhesion G protein-coupled receptor A3                                              |
| HAPAT                      | AHSA1. Activator of 90 kDa heat shock protein ATPase homolog 1                             |
| SPRRA                      | AMER1. APC membrane recruitment protein 1                                                  |
| SVLHS, EELDK               | AMRP. Alpha-2-macroglobulin receptor-associated protein                                    |
| DGVYF                      | ANM3. Protein arginine N-methyltransferase 3                                               |
| VLYQD                      | ANM5. Protein arginine N-methyltransferase 5                                               |
| SSVLH                      | ANM6. Protein arginine N-methyltransferase 6                                               |
| NITNL                      | APAF. Apoptotic protease-activating factor 1                                               |
| DSLSS                      | APC. Adenomatous polyposis coli protein                                                    |
| FTVEK                      | APCL. Adenomatous polyposis coli protein 2                                                 |
| GTNTS                      | ARI3B. AT-rich interactive domain-containing protein 3B                                    |
| SPTKL, TEVPV               | ASPP2. Apoptosis-stimulating of p53 protein 2                                              |
| KGCCS                      | ATM. Serine-protein kinase ATM                                                             |
| PGDSS, ALNTL               | ATR. Serine/threonine-protein kinase ATR                                                   |
| NSPRR                      | B4GA1. Beta-1,4-glucuronyltransferase 1                                                    |
| ITGRL, QQLIR               | BAP1. Ubiquitin carboxyl-terminal hydrolase BAP1                                           |
| SFELL                      | BARD1. BRCA1-associated RING domain protein 1                                              |
| DPFLG                      | BC11B. B cell lymphoma/leukemia 11B                                                        |
| VFNAT, EDDSE               | BECN1. Beclin-1                                                                            |
| LPPLL, GAGAA, QDVVN, SPDVD | BICRA. BRD4-interacting chromatin-remodeling complex-associated protein                    |
| ISVTT                      | BIN1. Myc box-dependent-interacting protein 1                                              |
| TEIYQ, LGFIA               | BMR1A. Bone morphogenetic protein receptor type-1A                                         |
| EPQII                      | BRCA1. Breast cancer type 1 susceptibility protein                                         |
| SLGAE, LAATK, EPVLK        | BRCA2. Breast cancer type 2 susceptibility protein                                         |
| KLQDV                      | BRD4. Bromodomain-containing protein 4                                                     |
| KVGGN, TGRLQS              | BRD7. Bromodomain-containing protein 7                                                     |
| KEELD                      | BRD8. Bromodomain-containing protein 8                                                     |
| GDSSS                      | BRD9. Bromodomain-containing protein 9                                                     |
| SLLIVN, SVLYN              | BRE1A. E3 ubiquitin-protein ligase BRE1A                                                   |
| AVDCAL                     | BRPF1. Peregrin                                                                            |
| QTLAL                      | BUB1B. Mitotic checkpoint serine/threonine-protein kinase BUB1 $\beta$                     |
| SPRRA, SALLA               | CA2D3. Voltage-dependent calcium channel subunit $\alpha$ -2/ $\delta$ -3                  |
| AVEQD                      | CARF. CDKN2A-interacting protein                                                           |
| LREFV, ASALG               | CBL. E3 ubiquitin-protein ligase CBL                                                       |
| PGDSS, TFLLK, LPDPS        | CBX8. Chromobox protein homolog 8                                                          |
| RSVAS                      | CCAR2. Cell cycle and apoptosis regulator protein 2                                        |
| KEELD                      | CDC37. Hsp90 co-chaperone Cdc37                                                            |
| PYRVV                      | CDC73. Parafibromin                                                                        |
| AYSNN                      | CDHR2. Cadherin-related family member 2                                                    |
| GQSKR                      | CDK10. Cyclin-dependent kinase 10                                                          |

(Continued)

**Supplementary Table S2** (Continued)

|                      |                                                                      |
|----------------------|----------------------------------------------------------------------|
| LVRDL, LPPLL, ILSRL  | CHD5. Chromodomain-helicase-DNA-binding protein 5                    |
| NNSYE                | CHFR. E3 ubiquitin-protein ligase CHFR                               |
| DEVQR                | CI014. Putative uncharacterized protein encoded by LINC00032         |
| QDVNC                | CIAO1. Probable cytosolic iron-sulfur protein assembly protein CIAO1 |
| KIADY, LNESL         | CIP2A. Protein CIP2A                                                 |
| FNKVT                | CLCA1. Calcium-activated chloride channel regulator 1                |
| SALEP, RVVVL         | CMTA2. Calmodulin-binding transcription activator 2                  |
| ELGKY                | COMD1. COMM domain-containing protein 1                              |
| SLSST, SSTAS         | CRCM. Colorectal mutant cancer protein                               |
| EHVNN                | CSK21. Casein kinase II subunit $\alpha$                             |
| EHVNN                | CSK23. Casein kinase II subunit $\alpha$ 3                           |
| TLDSKV, SIVRF        | CSMD1. CUB and sushi domain-containing protein 1                     |
| SFELL, SSTAS         | CSRN1. Cysteine/serine-rich nuclear protein 1                        |
| VLPLL                | CTDSL. CTD small phosphatase-like protein                            |
| ALDPL                | DAB2. Disabled homolog 2                                             |
| IQDSL                | DAPK1. Death-associated protein kinase 1                             |
| RVVVL                | DCC. Netrin receptor DCC                                             |
| SFELLH, LDITP, LGAEN | DDB1. DNA damage-binding protein 1                                   |
| SSANN, GAAAY         | DDX17. Probable ATP-dependent RNA helicase DDX17                     |
| GGNYN                | DDX3X. ATP-dependent RNA helicase DDX3X                              |
| FFSNV, VEKGI         | DDX58. Antiviral innate immune response receptor RIG-I               |
| VITPG, NGIGV         | DEPD5. GATOR complex protein DEPDC5                                  |
| NSASFS               | DERPC. Decreased expression in renal and prostate cancer protein     |
| TQNVL                | DIS3L2. DIS3-like exonuclease 2                                      |
| SSTAS                | DIDO1. Death-inducer obliterator 1                                   |
| YRVVV                | DIRA1. GTP-binding protein Di-Ras1                                   |
| YRVVV                | DIRA3. GTP-binding protein Di-Ras3                                   |
| LDSKV, DCLGD         | DLEC1. Deleted in lung and esophageal cancer protein 1               |
| QVKQI                | DLG1. Disks large homolog 1                                          |
| PGQTG                | DMRT1. Doublesex- and mab-3-related transcription factor 1           |
| AALQIP               | DMTF1. Cyclin-D-binding Myb-like transcription factor 1              |
| PREGV                | DNJA3. DnaJ homolog subfamily A member 3, mitochondrial              |
| LEPLV, TQLNR         | DOCK8. Deducator of cytokinesis protein 8                            |
| VTLAD                | DVL3. Segment polarity protein disheveled homolog DVL-3              |
| SASFS                | E41L3. Band 4.1-like protein 3                                       |
| GAGAA                | E4F1. Transcription factor E4F1                                      |
| NIIRGW               | EAF6. Chromatin modification-related protein MEAF6                   |
| TAGAAL               | EGFR. Epidermal growth factor receptor                               |
| GDEVV                | EGLN1. Egl nine homolog 1                                            |
| LDSKT                | EHF. ETS homologous factor                                           |
| DEDDSE               | EHMT1. Histone-lysine N-methyltransferase EHMT1                      |
| AGAAA                | EHMT2. Histone-lysine N-methyltransferase EHMT2                      |
| NLLLQ                | EI24. Etoposide-induced protein 2.4 homolog                          |
| LQSLQ                | EIF3E. Eukaryotic translation initiation factor 3 subunit E          |

**Supplementary Table S2** (Continued)

|                                          |                                                                                                              |
|------------------------------------------|--------------------------------------------------------------------------------------------------------------|
| APATV                                    | ELOB. Elongin-B                                                                                              |
| LPDPS                                    | EP300. Histone acetyltransferase p300                                                                        |
| YTSAL                                    | EPHB2. Ephrin type-B receptor 2                                                                              |
| RISNC, LPPLL                             | ERRFI. ERBB receptor feedback inhibitor 1                                                                    |
| SALGK                                    | ESS2. Splicing factor ESS-2 homolog                                                                          |
| ITDAV                                    | EXT1. Exostosin-1                                                                                            |
| ALLAG                                    | EXT2. Exostosin-2                                                                                            |
| GQTGK                                    | EZH2. Histone-lysine N-methyltransferase EZH2                                                                |
| SSTAS, CDVVI                             | F120A. Constitutive coactivator of PPAR-gamma-like protein 1                                                 |
| LFLPF, IGAGI                             | FANCM. Fanconi anemia group M protein                                                                        |
| VFRSS, SGTNG, SLSSTA                     | FAT1. Protocadherin Fat 1                                                                                    |
| DSSSG, SLSSTA, MVTIM                     | FAT3. Protocadherin Fat 3                                                                                    |
| GTNGT, LVRDL, DSSSG, RTFLL, LTGTG, TSALL | FAT4. Protocadherin Fat 4                                                                                    |
| FGEVF, TLEIL                             | FES. Tyrosine-protein kinase Fes/Fps                                                                         |
| GPKKS                                    | FLCN. Folliculin                                                                                             |
| LSSTA, RLNEV                             | FOCAD. Focadhesin                                                                                            |
| GAGAA                                    | FOXC1. Forkhead box protein C1                                                                               |
| RISNC                                    | FOXD1. Forkhead box protein D1                                                                               |
| QLTPT, VASQS                             | GCR. Glucocorticoid receptor                                                                                 |
| ALEPL, KNKCV                             | GGNB2. Gametogenetin-binding protein 2                                                                       |
| HVSGT, QQLIR                             | GSDME. Gasdermin-E                                                                                           |
| KLIAN                                    | HABP2. Hyaluronan-binding protein 2                                                                          |
| IGAGICA, VTLAD                           | HAVR2. Hepatitis A virus cellular receptor 2                                                                 |
| VLLPL, TLLAL, DPLSE                      | HDAC7. Histone deacetylase 7                                                                                 |
| TFGAG                                    | HERC5. E3 ISG15-protein ligase HERC5                                                                         |
| GYQPY                                    | HGS. Hepatocyte growth factor-regulated tyrosine kinase substrate                                            |
| MDLEG                                    | HIC2. Hypermethylated in cancer 2 protein                                                                    |
| LDSKT                                    | HIF1A. Hypoxia-inducible factor 1- $\alpha$                                                                  |
| GCVIA, QPYRV, VSVIT                      | HIPK2. Homeodomain-interacting protein kinase 2                                                              |
| DSSSG                                    | HM20B. SWI/SNF-related matrix-associated actin-dependent regulator of chromatin subfamily E member 1-related |
| VLTES                                    | HTRA3. Serine protease HTRA3                                                                                 |
| LLPLV, LADAG, DEDDS, STASAL, EAEVQ,      | HUWE1. E3 ubiquitin-protein ligase HUWE1                                                                     |
| QLSSN                                    | IF4E. Eukaryotic translation initiation factor 4E                                                            |
| TLADA, ASALG                             | IFRD2. Interferon-related developmental regulator 2                                                          |
| TLKSF, RLQSL                             | IL24. Interleukin-24                                                                                         |
| SALLA, LNTLV                             | INP4B. Inositol polyphosphate 4-phosphatase type II                                                          |
| VLLPL                                    | INT6. Integrator complex subunit 6                                                                           |
| KTSVD, LGKYE                             | ITIH5. Inter- $\alpha$ -trypsin inhibitor heavy chain H5                                                     |
| RSVAS                                    | JHD2C. Probable JmjC domain-containing histone demethylation protein 2C                                      |
| QTLLA, KIQDS                             | KANK1. KN motif and ankyrin repeat domain-containing protein 1                                               |
| SVTTE, LSSTA, DEDDS                      | KAT6B. Histone acetyltransferase KAT6B                                                                       |
| EVFNA                                    | KCD21. BTB/POZ domain-containing protein KCTD21                                                              |

(Continued)

**Supplementary Table S2** (Continued)

|                                   |                                                                                     |
|-----------------------------------|-------------------------------------------------------------------------------------|
| QTLA                              | KDM5B. Lysine-specific demethylase 5B                                               |
| GDSSS, EELDK                      | K113B. Kinesin-like protein KIF13B                                                  |
| LLAGT, LAGTI                      | KIF1B. Kinesin-like protein KIF1B                                                   |
| ADYNY                             | KIF3A. Kinesin-like protein KIF3A                                                   |
| LALHR, ANLAAT                     | KISSR. KiSS-1 receptor                                                              |
| SFSTF, GAGAA                      | KLF4. Krueppel-like factor 4                                                        |
| VKLHY                             | KS6A1. Ribosomal protein S6 kinase $\alpha$ -1                                      |
| VKLHY                             | KS6A2. Ribosomal protein S6 kinase $\alpha$ -2                                      |
| VKLHY                             | KS6A3. Ribosomal protein S6 kinase $\alpha$ -3                                      |
| DISGI                             | L2GL1. Lethal(2) giant larvae protein homolog 1                                     |
| HADQL                             | LARG2. LARGE xylosyl- and glucuronyltransferase 2                                   |
| SKPSK                             | LATS1. Serine/threonine-protein kinase LATS1                                        |
| ARDLI                             | LATS2. Serine/threonine-protein kinase LATS2                                        |
| LQELG                             | LGR6. Leucine-rich repeat-containing G-protein coupled receptor 6                   |
| FIEDL                             | LIMD1. LIM domain-containing protein 1                                              |
| GAGIC                             | LN28A. Protein lin-28 homolog A                                                     |
| GKLQD                             | LPPRC. Leucine-rich PPR motif-containing protein, mitochondrial                     |
| NGLTV                             | LRP1B. Low-density lipoprotein receptor-related protein 1B                          |
| TNTSN, STASA                      | M3K7. Mitogen-activated protein kinase kinase kinase 7                              |
| SLSST                             | MAF. Transcription factor Maf                                                       |
| ALHRS                             | MAGI2. Membrane-associated guanylate kinase, WW and PDZ domain-containing protein 2 |
| LPDPS                             | MAP1S. Microtubule-associated protein 1S                                            |
| GDSTE                             | MAST2. Microtubule-associated serine/threonine-protein kinase 2                     |
| EGKQG                             | MAVS. Mitochondrial antiviral-signaling protein                                     |
| SNIIR, TQLNR, VLYEN               | MIO. GATOR complex protein MIOS                                                     |
| VNNTV                             | MIRO1. Mitochondrial Rho GTPase 1                                                   |
| SNLLL                             | MK01. Mitogen-activated protein kinase 1                                            |
| LVKNK, VLPPL                      | MPP3. MAGUK p55 subfamily member 3                                                  |
| NQVAV, AARDL                      | MSH2. DNA mismatch repair protein Msh2                                              |
| ITPGT                             | MTAP2. Microtubule-associated protein 2                                             |
| SSTAS                             | MTG16. Protein CBFA2T3                                                              |
| VYDPL                             | MTOR. Serine/threonine-protein kinase mTOR                                          |
| YSNNS                             | MTUS1. Microtubule-associated tumor suppressor 1                                    |
| TVEKG, LPDPS, GFIKQ, SSVLN        | MY18B. Unconventional myosin-XVIIIb                                                 |
| AGAGAA                            | MZT1. Mitotic-spindle organizing protein 1                                          |
| LPLVS                             | NACC1. Nucleus accumbens-associated protein 1                                       |
| IPIGA, KEELDK                     | NAPEP. N-acyl-phosphatidylethanolamine-hydrolyzing phospholipase D                  |
| LDITP                             | NDRG1. Protein NDRG1                                                                |
| YLTPG, LTPGD                      | NEMF. Nuclear export mediator factor NEMF                                           |
| LALHR, LVKQL, VLGQS, PLQPE, SCLKG | NF1. Neurofibromin                                                                  |
| LVRDL                             | NFKB1. Nuclear factor NF-kappa-B p105 subunit                                       |
| ALLAG                             | NFKB2. Nuclear factor NF-kappa-B p100 subunit                                       |
| SLSST                             | NISCH. Nischarin                                                                    |
| SFSTF                             | NIT2. Omega-amidase NIT2                                                            |

**Supplementary Table S2** (Continued)

|                                      |                                                                       |
|--------------------------------------|-----------------------------------------------------------------------|
| KQLSS                                | NKX31. Homeobox protein Nkx-3.1                                       |
| ANLAA                                | NMDE2. Glutamate receptor ionotropic, NMDA 2B                         |
| KVTLA                                | NPM. Nucleophosmin                                                    |
| NCVAD                                | OGR1. Ovarian cancer G-protein coupled receptor 1                     |
| FSALE, AQALN                         | OVCA2. Esterase OVCA2                                                 |
| NVLYE                                | PA2G4. Proliferation-associated protein 2G4                           |
| SLSST                                | PACER. Protein associated with UVRAG as autophagy enhancer            |
| LQYGS                                | PB1. Protein polybromo-1                                              |
| GTNTS                                | PCGF2. Polycomb group RING finger protein 2                           |
| PLSET                                | PCGF6. Polycomb group RING finger protein 6                           |
| YENQK                                | PEG3. Paternally expressed gene 3 protein                             |
| QTLEIL                               | PFD3. Prefoldin subunit 3                                             |
| PLVSS, ESNKK                         | PHC3. Polyhomeotic-like protein 3                                     |
| TEVPV, NFSQI                         | PHLP2. PH domain leucine-rich repeat-containing protein phosphatase 2 |
| LVKQLS, KQLSS                        | PIAS1. E3 SUMO-protein ligase PIAS1                                   |
| TEVPV                                | PININ. Pinin                                                          |
| SLSST, RASAN, LQELGK                 | PKHG2. Pleckstrin homology domain-containing family G member 2        |
| FCGKG                                | PKHO1. Pleckstrin homology domain-containing family O member 1        |
| GAGAA                                | PLAT2. Phospholipase A and acyltransferase 2                          |
| GAGAA                                | PLAT3. Phospholipase A and acyltransferase 3                          |
| LLALH                                | PML. Protein PML                                                      |
| LFNKV                                | PMS1. PMS1 protein homolog 1                                          |
| SPRRA, KNLNE                         | PNM8A. Paraneoplastic antigen-like protein 8°                         |
| VYDPL                                | PPAP. Prostatic acid phosphatase                                      |
| LPPLL, GIGVT, AISSV                  | PRDM2. PR domain zinc finger protein 2                                |
| IITTD, EDDSE                         | PRDM4. PR domain zinc finger protein 4                                |
| PQGFS                                | PRR5. Proline-rich protein 5                                          |
| LVLLP                                | PTC1. Protein patched homolog 1                                       |
| LVLLP                                | PTC2. Protein patched homolog 2                                       |
| IDRLI                                | PTPRJ. Receptor-type tyrosine-protein phosphatase eta                 |
| SKRSF, IVMVT                         | PTPRK. Receptor-type tyrosine-protein phosphatase kappa               |
| LEILD                                | RAP1A. Ras-related protein Rap-1A                                     |
| AGAAA                                | RASA1. Ras GTPase-activating protein 1                                |
| QSKRV                                | RASEF. Ras and EF-hand domain-containing protein                      |
| NLAAT                                | RASF5. Ras association domain-containing protein 5                    |
| SSTAS                                | RASFA. Ras association domain-containing protein 10                   |
| RKSNL, ISTEI                         | RB. Retinoblastoma-associated protein                                 |
| LVSSQ, GDSSS, LFRKS, SFCTQ           | RBCC1. RB1-inducible coiled-coil protein 1                            |
| LQDVV                                | RBL1. Retinoblastoma-like protein 1                                   |
| ADAGF, TYVPA                         | RBM5. RNA-binding protein 5                                           |
| GFNFS, KLQDV                         | RBP2. E3 SUMO-protein ligase RanBP2                                   |
| AVEQD                                | RGPA1. Ral GTPase-activating protein subunit $\alpha$ -1              |
| LDSKV, LFRKS, TEIYQ,<br>SLSST, NLAAT | RHG07. Rho GTPase-activating protein 7                                |
| AKNLN                                | RHG29. Rho GTPase-activating protein 29                               |

(Continued)

**Supplementary Table S2** (Continued)

|                            |                                                                                                      |
|----------------------------|------------------------------------------------------------------------------------------------------|
| SSTAS                      | RHG35. Rho GTPase-activating protein 35                                                              |
| DSSSG, SPRRA               | RNF43. E3 ubiquitin-protein ligase RNF43                                                             |
| LADAG                      | RRAGC. Ras-related GTP-binding protein C                                                             |
| LADAG                      | RRAGD. Ras-related GTP-binding protein D                                                             |
| LNRAL                      | RUVB2. RuvB-like 2                                                                                   |
| IAGLI                      | S26A3. Chloride anion exchanger                                                                      |
| CSFGG                      | SASH1. SAM and SH3 domain-containing protein 1                                                       |
| QDKNT                      | SATB1. DNA-binding protein SATB1                                                                     |
| RDLPQ, NSVAY               | SCAI. Protein SCAI                                                                                   |
| RLQSL                      | SCRIB. Protein scribble homolog                                                                      |
| AGCLI                      | SDHA. Succinate dehydrogenase (ubiquinone) flavoprotein subunit, mitochondrial                       |
| LLTDE                      | SDS3. Sin3 histone deacetylase corepressor complex component SDS3                                    |
| NKVTL                      | SEC13. Protein SEC13 homolog                                                                         |
| AGAAA                      | SEM3B. Semaphorin-3B                                                                                 |
| EIDRL, IDRLN, DRLNE        | SET. Protein SET                                                                                     |
| LTGTG, ILDTI, IYKTP, STASA | SETB1. Histone-lysine N-methyltransferase SETDB1                                                     |
| FASVY, IEDLL               | SGSM3. Small G protein signaling modulator 3                                                         |
| LQPRT, DSFVI               | SHAN2. SH3 and multiple ankyrin repeat domains protein 2                                             |
| DPFLG                      | SIR2. NAD-dependent protein deacetylase sirtuin-2                                                    |
| PATVC                      | SMAD2. Mothers against decapentaplegic homolog 2                                                     |
| DLPQG, AGAAL               | SMAD6. Mothers against decapentaplegic homolog 6                                                     |
| DSSSG, EDDSE               | SMCA4. Transcription activator BRG1                                                                  |
| AGAAA                      | SMRD1. SWI/SNF-related matrix-associated actin-dependent regulator of chromatin subfamily D member 1 |
| GAGAA                      | SMRD1. SWI/SNF-related matrix-associated actin-dependent regulator of chromatin subfamily D member 1 |
| FLGVY, TEILP, DSEPV        | SN12L. Schlafen family member 12-like                                                                |
| LVSSQ                      | SP1. Transcription factor Sp1                                                                        |
| DPSKP, LQSLQ               | SQSTM. Sequestosome-1                                                                                |
| PLVSS, LFRKS, TEIYQ        | STA13. StAR-related lipid transfer protein 13                                                        |
| TLLAL                      | STEAP3. Metalloreductase STEAP3                                                                      |
| PPLLT                      | STIM1. Stromal interaction molecule 1                                                                |
| GLIAI                      | STIP1. Stress-induced-phosphoprotein 1                                                               |
| NCVAD                      | STK3. Serine/threonine-protein kinase 3                                                              |
| NCVAD                      | STK4. Serine/threonine-protein kinase 4                                                              |
| SLGAE                      | SYNP2. Synaptopodin-2                                                                                |
| SALLA                      | T132E. Transmembrane protein 132E                                                                    |
| YSTGS, GDIAA               | TACC2. Transforming acidic coiled-coil-containing protein 2                                          |
| YLTPGD, SALLA              | TAF1C. TATA box-binding protein-associated factor RNA polymerase I subunit C                         |
| TQSLI, NFKNL, AGAAA        | TASOR. Protein TASOR                                                                                 |
| SPRRA                      | TBKB1. TANK-binding kinase 1-binding protein 1                                                       |
| EPLVD                      | TBRG1. Transforming growth factor $\beta$ regulator 1                                                |
| STNLV                      | TF2H1. General transcription factor IIH subunit 1                                                    |
| DKVFR, LYNSA               | TGO1. Transport and Golgi organization protein 1 homolog                                             |
| LDKVE                      | THEM4. Acyl-coenzyme A thioesterase THEM4                                                            |

**Supplementary Table S2** (Continued)

|                                          |                                                                    |
|------------------------------------------|--------------------------------------------------------------------|
| PPAYT                                    | TM127. Transmembrane protein 127                                   |
| <b>VTLADAG</b>                           | TNK1. Nonreceptor tyrosine-protein kinase TNK1                     |
| <b>LHRSYL</b>                            | TOPB1. DNA topoisomerase 2-binding protein 1                       |
| NVVIK                                    | TOPK. Lymphokine-activated killer T cell-originated protein kinase |
| <b>SLGAE, QDSLS, KQLSS, DLGDIS</b>       | TP53B. TP53-binding protein 1                                      |
| LSRLD                                    | TRI13. E3 ubiquitin-protein ligase TRIM13                          |
| <b>SFKEELD</b>                           | TRI35. Tripartite motif-containing protein 35                      |
| DVDLG                                    | TRI36. E3 ubiquitin-protein ligase TRIM36                          |
| VTQQL                                    | TRI37. E3 ubiquitin-protein ligase TRIM37                          |
| GAALQ                                    | TRIP6. Thyroid receptor-interacting protein 6                      |
| LVDLP                                    | TRIPC. E3 ubiquitin-protein ligase TRIP12                          |
| ASVYA, LEILD                             | TSC1. Hamartin                                                     |
| ENSVA                                    | TSC2. Tuberin                                                      |
| ALGKL                                    | TUT7. Terminal uridylyltransferase 7                               |
| VNLTT                                    | UBP20. Ubiquitin carboxyl-terminal hydrolase 20                    |
| LLTDE                                    | UBP28. Ubiquitin carboxyl-terminal hydrolase 28                    |
| VNLTT                                    | UBP33. Ubiquitin carboxyl-terminal hydrolase 33                    |
| NGTKR, APHGV                             | UBP7. Ubiquitin carboxyl-terminal hydrolase 7                      |
| LQELG                                    | UBXN1. UBX domain-containing protein 1                             |
| LPPLL, LQSLQ                             | UN93A. Protein unc-93 homolog A                                    |
| DQLTP                                    | USH1C. Harmonin                                                    |
| YKTPP                                    | UVRAG. UV radiation resistance-associated gene protein             |
| GDSSS                                    | VMA5A. von Willebrand factor A domain-containing protein 5A        |
| SNLLL                                    | VRK1. Serine/threonine-protein kinase VRK1                         |
| ITPGT                                    | XRN1. 5'-3' exoribonuclease 1                                      |
| LAATK                                    | YAP1. Transcriptional coactivator YAP1                             |
| AGAAA, CDVVI                             | ZBT7A. Zinc finger and BTB domain-containing protein 7A            |
| <b>TAGAAA, GYLQP, TGTG, STASA, SLQTY</b> | ZFH3. Zinc finger homeobox protein 3                               |
| TQSLL                                    | ZN217. Zinc finger protein 217                                     |
| SVTTE                                    | ZN276. Zinc finger protein 276                                     |
| QPELD                                    | ZNRF3. E3 ubiquitin-protein ligase ZNRF3                           |
| RSVAS, PDVDL                             | ZO1. Tight junction protein ZO-1                                   |
| RSSVL, TSCCS                             | ZZEF1. Zinc finger ZZ-type and EF-hand domain-containing protein 1 |

Abbreviations: gp, glycoprotein; SARS-CoV-2, severe acute respiratory syndrome coronavirus 2.

Note: Two-hundred ninety-four proteins have 308 (462, including multiple occurrences) pentapeptides in common with the spike gp antigen. Hexa/heptapeptides deriving from overlapping pentapeptides are given in bold.
